# Supplementary material for: Hydroxycinnamic Acid Derivatives Obtained from a Commercial Crataegus Extract and from Authentic Crataegus spp
Source: PubMed Central journal article supplement (PMC4475804; doi:10.3797/scipharm.1404-02), 2014-08-21
Supplement: Scipharm-2014-82-835-Support.pdf [file Scipharm-2014-82-835-Support.pdf]

## Supporting Information to

**Hydroxycinnamic Acid Derivatives Obtained from a Commercial  
*Crataegus* Extract and from Authentic *Crataegus* spp.****Ulrich KUCZKOWIAK, Frank PETEREIT, Adolf NAHRSTEDT**

Published in Sci Pharm. 2014; 82: 835–846

doi:10.3797/scipharm.1404-02

Available from: <http://dx.doi.org/10.3797/scipharm.1404-02>© Kuczkowiak *et al.*; licensee Österreichische Apotheker-Verlagsgesellschaft m. b. H., Vienna, Austria.

This is an Open Access article distributed under the terms of the Creative Commons Attribution License (<http://creativecommons.org/licenses/by/3.0/>), which permits unrestricted use, distribution, and reproduction in any medium, provided the original work is properly cited.

**Table of Contents**

- Tab. 1S.** <sup>1</sup>H-NMR data of monocoumaroylquinic acids, *p*-coumaric acid, and free D-(–)-quinic acid
- Tab. 2S.** <sup>1</sup>H-NMR data of monohydroxycinnamoylquinic acids, caffeic acid, and free D-(–)-quinic acid
- Tab. 3S.** <sup>13</sup>C-NMR data of monocaffeoylquinic acids and free D-(–)-quinic acid
- Tab. 4S.** <sup>1</sup>H-NMR and <sup>13</sup>C-NMR data of dicaffeoylquinic acids
- Tab. 5S.** <sup>1</sup>H-NMR data of hydroxycinnamoyl aldonic and malic acid derivatives
- Tab. 6S.** <sup>13</sup>C-NMR data of hydroxycinnamoyl aldonic and malic acid derivatives
- Tab. 7S.** <sup>1</sup>H-NMR of L-threonic acid and γ-L-threonic acid lactone

**Tab. 1S.** <sup>1</sup>H-NMR data of monocoumaroylquinic acids, *p*-coumaric acid, and free D-(–)-quinic acid (rel. to CD<sub>3</sub>OD = δ 3.30 ppm; M = multiplicity)

| H                       | 1     |               | 3     |                 | 4     |                 | M           | D-(–)-quinic acid |                 |
|-------------------------|-------|---------------|-------|-----------------|-------|-----------------|-------------|-------------------|-----------------|
|                         | (ppm) | <i>J</i> (Hz) | (ppm) | <i>J</i> (Hz)   | (ppm) | <i>J</i> (Hz)   |             | (ppm)             | <i>J</i> (Hz)   |
| 2ax                     | 2.20  | 2.4; -14      | 2.17  | 2.8; -13.5      | 2.17  | 3.4; -14.2      | <i>dd</i>   | 2.06              | 3.3; -14.5      |
| 2eq                     | 2.14  | 2.0; 4.3; -14 | 2.07  | 2.4; 3.8; -13.5 | 2.04  | 2.2; 5.3; -14.2 | <i>ddd</i>  | 2.02              | 2.0; 3.3; -14.5 |
| 6ax                     | 1.95  | 10; -13       | 2.01  | 11.0; -13.5     | 2.08  | 9.3; -13.5      | <i>dd</i>   | 1.85              | 11.0; -13.5     |
| 6eq                     | 2.14  | 2.0; 4.3; -13 | 2.20  | 2.4; 4.0; -13.5 | 2.22  | 2.2; 4.4; -13.5 | <i>ddd</i>  | 2.12              | 2.0; 4.7; -13.5 |
| 3                       | 5.36  | 2.4; 3.2; 4.3 | 4.29  | 2.8; 3.3; 3.8   | 4.16  | 2.9; 3.4; 5.3   | <i>ddd</i>  | 4.08              | 3.3; 3.7; 3.2   |
| 4                       | 3.64  | 3.2; 9        | 4.80  | 3.3; 9.4        | 3.72  | 2.9; 8.4        | <i>dd</i>   | 3.39              | 3.2; 9.2        |
| 5                       | 4.15  | 9; 4.3; 10    | 4.28  | 4.0; 9.4; 11.0  | 5.33  | 4.4; 8.4; 9.3   | <i>ddd</i>  | 3.99              | 4.7; 9.2; 11    |
| <i>p</i> -coumaric acid |       |               |       |                 |       |                 |             |                   |                 |
| 2'                      | 7.45  | 2.3; 8.6      | 7.47  | 2.3; 8.6        | 7.46  | 2.3; 8.6        | <i>d(d)</i> | 7.41              | 2.3; 8.6        |
| 3'                      | 6.80  | 2.3; 8.6      | 6.80  | 2.3; 8.6        | 6.80  | 2.3; 8.6        | <i>d(d)</i> | 6.79              | 2.3; 8.6        |
| 5'                      | 6.80  | 2.3; 8.6      | 6.80  | 2.3; 8.6        | 6.80  | 2.3; 8.6        | <i>d(d)</i> | 6.79              | 2.3; 8.6        |
| 6'                      | 7.45  | 2.3; 8.6      | 7.47  | 2.3; 8.6        | 7.46  | 2.3; 8.6        | <i>d(d)</i> | 7.41              | 2.3; 8.6        |
| 7'                      | 7.65  | 15.9          | 7.70  | 15.9            | 7.62  | 15.9            | <i>d</i>    | 7.59              | 15.9            |
| 8'                      | 6.36  | 15.9          | 6.42  | 15.9            | 6.32  | 15.9            | <i>d</i>    | 6.27              | 15.9            |
| 400 MHz                 |       | 600 MHz       |       | 400 MHz         |       | 200 MHz         |             |                   |                 |

**Tab. 2S.** <sup>1</sup>H-NMR data of monohydroxycinnamoylquinic acids, caffeic acid, and free D-(–)-quinic acid (rel. to CD<sub>3</sub>OD = δ 3.30 ppm; M = multiplicity)

| H            | 4     |                 | 5     |                 | 6     |                 | M          | D-(–)-quinic acid |                 |
|--------------|-------|-----------------|-------|-----------------|-------|-----------------|------------|-------------------|-----------------|
|              | (ppm) | <i>J</i> (Hz)   | (ppm) | <i>J</i> (Hz)   | (ppm) | <i>J</i> (Hz)   |            | (ppm)             | <i>J</i> (Hz)   |
| 2ax          | 2.18  | 3.2; -14.3      | 2.17  | 2.4; -14.4      | 2.17  | 3.4; -14.2      | <i>dd</i>  | 2.05              | 3.3; -14.5      |
| 2eq          | 2.13  | 2.0; 4.3; -14.3 | 2.07  | 2.4; 3.4; -14.4 | 2.04  | 2.2; 5.4; -14.2 | <i>ddd</i> | 2.02              | 2.0; 3.3; -14.5 |
| 6ax          | 1.94  | 9.7; -13.4      | 2.01  | 10.5; -13.5     | 2.07  | 9.3; -13.5      | <i>dd</i>  | 1.85              | 11.0; -13.5     |
| 6eq          | 2.11  | 2.0; 4.0; -13.4 | 2.21  | 2.4; 4; -13.5   | 2.22  | 2.2; 4.4; -13.5 | <i>ddd</i> | 2.12              | 2.0; 4.7; -13.5 |
| 3            | 5.34  | 3.2; 3.2; 4.3   | 4.28  | 2.4; 3.3; 3.4   | 4.16  | 3.3; 3.4; 5.4   | <i>ddd</i> | 4.08              | 3.3; 3.7; 3.4   |
| 4            | 3.63  | 3.2; 8.3        | 4.80  | 3.3; 9.6        | 3.72  | 3.3; 8.4        | <i>dd</i>  | 3.39              | 3.4; 9.2        |
| 5            | 4.14  | 4.0; 8.3; 9.7   | 4.29  | 4.0; 9.6; 10.5  | 5.33  | 4.4; 8.4; 9.3   | <i>ddd</i> | 3.99              | 4.7; 9.2; 11    |
| caffeic acid |       |                 |       |                 |       |                 |            |                   |                 |
| 2'           | 7.03  | 1.90            | 7.06  | 1.90            | 7.04  | 1.90            | <i>d</i>   | 7.03              | 1.9             |
| 3'           | –     | –               | –     | –               | –     | –               | <i>d</i>   | –                 | –               |
| 5'           | 6.76  | 8.2             | 6.78  | 8.2             | 6.77  | 8.0             | <i>d</i>   | 6.77              | 8.2             |
| 6'           | 6.93  | 1.9; 8.2        | 6.95  | 1.9; 8.2        | 6.95  | 1.9; 8.0        | <i>d</i>   | 6.92              | 1.9; 8.2        |
| 7'           | 7.57  | 15.9            | 7.63  | 16.0            | 7.55  | 16.1            | <i>d</i>   | 7.53              | 15.9            |
| 8'           | 6.30  | 15.9            | 6.36  | 16.0            | 6.26  | 16.1            | <i>d</i>   | 6.21              | 15.9            |
| 200 MHz      |       | 400 MHz         |       | 360 MHz         |       | 200 MHz         |            |                   |                 |

**Tab. 3S.**  $^{13}\text{C}$ -NMR data of monocaffeoylquinic acids and free D-(-)-quinic acid (rel. to  $\text{CD}_3\text{OD} = \delta$  49 ppm, 50 MHz)

|    | 1      | 3      | 4      | 4      | 5      | 6      | D-(-)-quinic acid |
|----|--------|--------|--------|--------|--------|--------|-------------------|
| C  | (ppm)  | (ppm)  | (ppm)  | (ppm)  | (ppm)  | (ppm)  | (ppm)             |
| 1  | 75.42  | 76.61  | 76.22  | 75.46  | 76.61  | 76.17  | 76.88             |
| 2  | 36.75  | 38.41  | 38.26  | 36.77  | 38.43  | 38.12  | 38.43             |
| 3  | 73.03  | 69.67  | 71.36  | 73.02  | 69.69  | 71.35  | 71.93             |
| 4  | 74.87  | 79.34  | 73.58  | 74.84  | 79.34  | 73.57  | 77.1              |
| 5  | 68.29  | 65.52  | 72.02  | 68.34  | 65.54  | 71.86  | 68.03             |
| 6  | 41.57  | 42.72  | 38.88  | 41.53  | 42.74  | 38.85  | 42.39             |
| 7  | 178.29 | 177.27 | 177.04 | 178.5  | 177.27 | 176.96 | 177.56            |
| 1' | 127.44 | 127.32 | 127.30 | 128.04 | 127.92 | 127.78 |                   |
| 2' | 131.05 | 131.25 | 131.12 | 115.91 | 115.42 | 115.26 |                   |
| 3' | 116.80 | 116.82 | 116.84 | 146.81 | 146.74 | 146.59 |                   |
| 4' | 161.06 | 161.13 | 161.2  | 149.35 | 149.47 | 149.36 |                   |
| 5' | 116.80 | 116.82 | 116.84 | 116.51 | 116.53 | 116.49 |                   |
| 6' | 131.05 | 131.25 | 131.12 | 122.84 | 122.94 | 122.94 |                   |
| 7' | 146.42 | 146.74 | 146.66 | 146.81 | 147.12 | 147.01 |                   |
| 8' | 115.94 | 115.44 | 115.42 | 115.21 | 115.27 | 115.26 |                   |
| 9' | 169.00 | 168.99 | 168.70 | 169.04 | 169.03 | 168.70 |                   |

**Tab. 4S.**  $^1\text{H}$ -NMR and  $^{13}\text{C}$ -NMR data of dicaffeoylquinic acids (in  $\text{CD}_3\text{OD} = \delta$  3.30 ppm and 49.0 ppm)

| H     | 7           |                 | 8           |               |            | C       | 7               | 8               |
|-------|-------------|-----------------|-------------|---------------|------------|---------|-----------------|-----------------|
|       | (ppm)       | <i>J</i> (Hz)   | (ppm)       | <i>J</i> (Hz) | M          |         | (ppm)           | (ppm)           |
| 2ax   | 2.31        | 4.0; -13.8      | 2.30        | 3; -14.2      | <i>dd</i>  | C-1     | 74.77           | 76.15           |
| 2eq   | 2.15        | 1.5; 7.2; -13.8 | 2.10        | 2; 5.2; -14.2 | <i>ddd</i> | C-2     | 36.04           | 38.45           |
| 6ax   | 2.20        | 7.5; 14.0       | 2.23        | 9.3; -14      | <i>dd</i>  | C-3     | 72.58           | 69.00           |
| 6eq   | 2.23        | 1.5; 4.2; -14   | 2.28        | 2; 5; -14     | <i>ddd</i> | C-4     | 70.71           | 75.86           |
| 3     | 5.41        | 3; 4.0; 7.2     | 4.36        | 3; 3; 5.2     | <i>ddd</i> | C-5     | 72.13           | 69.42           |
| 4     | 3.98        | 3; 7.5          | 5.11        | 3; 9.3        | <i>dd</i>  | C-6     | 37.70           | 39.45           |
| 5     | 5.41        | 4.2; 7.5; 7.5   | 5.61        | 5; 9.3; 9.3   | <i>ddd</i> | C-7     | 17.74           | 176.76          |
|       |             |                 |             |               |            | C-1'/1" | 127.99 / 127.87 | 127.78 / 127.72 |
|       |             |                 |             |               |            | C-2'/2" | 115.97 / 115.68 | 115.27 / 115.27 |
| 2'/2" | 7.06 / 7.06 | 2.1             | 7.02 / 7.00 | 2.3           | <i>d</i>   | C-3'/3" | 146.77 / 146.77 | 147.70 / 147.57 |
| 3'/3" | -           | -               | -           | -             | <i>d</i>   | C-4'/4" | 149.56 / 149.47 | 149.67 / 149.67 |
| 5'/5" | 6.77 / 6.77 | 8.1             | 6.73 / 6.73 | 8.3           | <i>d</i>   | C-5'/5" | 116.51 / 116.51 | 116.53 / 116.53 |
| 6'/6" | 6.96 / 6.96 | 2.1; 8.1        | 6.93 / 6.89 | 2.3; 8.3      | <i>dd</i>  | C-6'/6" | 123.01 / 122.94 | 123.10 / 123.10 |
| 7'/7" | 7.61 / 7.57 | 16.1            | 7.60 / 7.51 | 16.1          | <i>d</i>   | C-7'/7" | 147.03 / 147.26 | 146.77 / 146.77 |
| 8'/8" | 6.34 / 6.26 | 16.1            | 6.28 / 6.18 | 16.1          | <i>d</i>   | C-8'/8" | 115.33 / 115.20 | 114.78 / 114.84 |

**Tab. 5S.**  $^1\text{H-NMR}$  data of hydroxycinnamoyl aldonic and malic acid derivatives (in  $\text{CD}_3\text{OD} = \delta$  3.30 ppm; M = multiplicity)

| H  | 10      |               |            | 11      |               |            | 9       |               |            | 12      |       |               |           |
|----|---------|---------------|------------|---------|---------------|------------|---------|---------------|------------|---------|-------|---------------|-----------|
|    | (ppm)   | <i>J</i> (Hz) | M          | (ppm)   | <i>J</i> (Hz) | M          | (ppm)   | <i>J</i> (Hz) | M          | H       | (ppm) | <i>J</i> (Hz) | M         |
| 2  | 4.24    | -             | <i>d</i>   | 4.25    | 2.0           | <i>d</i>   | 5.28    | 2.4           | <i>d</i>   | 2       | 5.48  | 4.4; 7.8      | <i>dd</i> |
| 3  | 4.24    | -             | <i>ddd</i> | 4.22    | 2.0; 6.0; 8.0 | <i>ddd</i> | 4.2     | 2.4; 5.0; 9.0 | <i>ddd</i> | 3a      | 2.96  | -16; 4.4      | <i>dd</i> |
| 4a | 4.26    | -             | <i>dd</i>  | 4.27    | 8; -11        | <i>dd</i>  | 3.63    | 6.0; -11.0    | <i>dd</i>  | 3b      | 2.91  | -16; 7.8      | <i>dd</i> |
| 4b | 4.26    |               | <i>dd</i>  | 4.26    | 6; -11        | <i>dd</i>  | 3.61    | 8.0; -11.0    | <i>dd</i>  |         |       |               |           |
| 2' | 7.04    | 1.7           | <i>d</i>   | 7.46    | 8.5; 2.3      | <i>d</i>   | 7.08    | 2.1           | <i>d</i>   | 2'      | 7.06  | 2.0           | <i>d</i>  |
| 3' | -       | -             | -          | 6.80    | 8.5; 2.3      | <i>dd</i>  | -       | -             | -          | 3'      | -     | -             | -         |
| 5' | 6.77    | 8.1           | <i>d</i>   | 6.80    | 8.5; 2.3      | <i>dd</i>  | 6.79    | 8.2           | <i>d</i>   | 5'      | 6.78  | 8.0           | <i>d</i>  |
| 6' | 6.95    | 1.7; 8.1      | <i>dd</i>  | 7.46    | 8.5; 2.3      | <i>dd</i>  | 6.97    | 2.1; 8.2      | <i>dd</i>  | 6'      | 6.95  | 2.1; 8.0      | <i>dd</i> |
| 7' | 7.58    | 15.9          | <i>d</i>   | 7.64    | 16.0          | <i>d</i>   | 7.68    | 15.8          | <i>d</i>   | 7'      | 7.60  | 15.8          | <i>d</i>  |
| 8' | 6.29    | 15.9          | <i>d</i>   | 6.35    | 16.0          | <i>d</i>   | 6.37    | 15.8          | <i>d</i>   | 8'      | 6.31  | 15.8          | <i>d</i>  |
|    | 600 MHz |               |            | 600 MHz |               |            | 200 MHz |               |            | 200 MHz |       |               |           |

**Tab. 6S.**  $^{13}\text{C-NMR}$  data of hydroxycinnamoyl aldonic and malic acid derivatives (50 MHz, in  $\text{CD}_3\text{OD} = \delta$  49.0 ppm; 10 also in  $\text{D}_2\text{O}$ )

\* These assignments may be interchanged

|    | 10                     | 10                   | 11                     | 9                      | 12                     |
|----|------------------------|----------------------|------------------------|------------------------|------------------------|
| C  | (ppm)                  | (ppm)                | (ppm)                  | (ppm)                  | (ppm)                  |
|    | -                      | 176.5                | 175.8                  | 172.2                  | 173.0*                 |
| 2  | 71.4                   | 71.9                 | 72.3                   | 73.6                   | 69.9                   |
| 3  | 71.4                   | 70.7                 | 72.2                   | 72.7                   | 37.1                   |
| 4  | 66.0                   | 65.7                 | 65.9                   | 63.1                   | 179.6*                 |
| 1' | 127.8                  | 127.7                | 127.2                  | 127.8                  | 127.7                  |
| 2' | 115.2                  | 114.5                | 131.2                  | 115.3                  | 116.6                  |
| 3' | 146.7                  | 145.0                | 116.8                  | 146.8                  | 146.7                  |
| 4' | 149.7                  | 147.9                | 161.2                  | 149.7                  | 149.7                  |
| 5' | 116.5                  | 115.8                | 116.8                  | 116.5                  | 115.3                  |
| 6' | 123.0                  | 123.6                | 131.2                  | 123.1                  | 123.2                  |
| 7' | 147.2                  | 147.0                | 146.8                  | 147.9                  | 148.1                  |
| 8' | 114.9                  | 116.9                | 115.0                  | 114.4                  | 114.2                  |
| 9' | 169.0                  | 169.9                | 169.0                  | 168.5                  | 168.1                  |
|    | $\text{CD}_3\text{OD}$ | $\text{D}_2\text{O}$ | $\text{CD}_3\text{OD}$ | $\text{CD}_3\text{OD}$ | $\text{CD}_3\text{OD}$ |

**Tab. 7S.**  $^1\text{H-NMR}$  of L-threonic acid and  $\gamma$ -L-threonic acid lactone (in  $\text{CD}_3\text{OD} = \delta$  3.30 ppm, 50 MHz; M = multiplicity)

| H  | M          | L-threonic acid |               | $\gamma$ -L-threonic acid lactone |               |
|----|------------|-----------------|---------------|-----------------------------------|---------------|
|    |            | (ppm)           | <i>J</i> (Hz) | (ppm)                             | <i>J</i> (Hz) |
| 2  | <i>d</i>   | 4.19            | 1.2           | 4.20                              | 7.6           |
| 3  | <i>ddd</i> | 3.97            | 1.2; 6.0; 7.3 | 4.29                              | 7.6; 6.8; 7.2 |
| 4a | <i>dd</i>  | 3.66            | 6.0; -11.0    | 4.41                              | 6.8; -9.1     |
| 4b | <i>dd</i>  | 3.61            | 7.3; -11.0    | 3.93                              | 7.2; -9.1     |
